# Supplementary material for: Approximate nearest neighbor graph provides fast and efficient embedding with applications for large-scale biological data
Source: PubMed Central journal article supplement — NAR Genom Bioinform. 2024 Dec 18;6(4):lqae172. doi: 10.1093/nargab/lqae172 (PMC11655291; doi:10.1093/nargab/lqae172), 2024-12-18
Supplement: lqae172_supplemental_file.pdf [file lqae172_supplemental_file.pdf]

## Supplementary tables

**Tables S1.** Comparison of annembed with Trimap for memory and running time.

| Dataset       | Number of data points | dimension | Peak memory (Trimap) | Peak memory (annembed) | Running time (Trimap) | Running time (annembed) |
|---------------|-----------------------|-----------|----------------------|------------------------|-----------------------|-------------------------|
| MNIST FASHION | 70,000                | 748       | 0.3G                 | 0.9G                   | 3 min 25 s            | 41.6s                   |
| MNIST DIGITS  | 70,000                | 748       | 0.3G                 | 0.3G                   | 3 min 15 s            | 39.2s                   |
| SIFT_1M       | 1 M                   | 128       | 4.4G                 | 17G                    | 1 h 03 min            | 25 min 33s              |
| HIGGS         | 11 M                  | 20        | 15.3G                | 58G                    | 10 h                  | 2 h 39 min              |

**Table S2.** LID and hubness estimated by annembed and comparisons with other implementations. 100-NN was used for estimation of LID and hubness based on Euclidean distance.

| Dataset       | Number of data points | dimension | LID (annembed) <sup>a</sup> | Hubness (annembed) | LID (MLE in Amsaleg et.al.,2015) |
|---------------|-----------------------|-----------|-----------------------------|--------------------|----------------------------------|
| MNIST FASHION | 70,000                | 748       | 22.97 (12.45)               | 3.28               | 19.6 (13.9)                      |
| MNIST DIGITS  | 70,000                | 748       | 17.5 (7.09)                 | 1.014              | 15.3 (8.4)                       |
| HIGGS         | 11 M                  | 20        | 14.9 (5.93)                 | 919.3              | --                               |

**Table S3.** Perplexity Quantile and embedding quality.

| Perplexity Quantile                          | 0.05 | 0.5  | 0.95 | 0.99 |
|----------------------------------------------|------|------|------|------|
| MNIST FASHION Embedding quality <sup>a</sup> | 3.90 | 5.99 | 6.00 | 6.00 |
| GTDB Embedding quality <sup>b</sup>          | 12   | 14.9 | 15   | 15   |

<sup>a</sup>Quality was defined by number of true neighbors in embedded space divided by total true neighbors in graph (we use 15, consistent with UMAP).

<sup>b</sup>We use true neighbors 25 in the genome case because biological database is sparse, and neighbors are not evenly distributed.

**Table S4.** Running time for t-SNE (single threaded), UWOT (NNS multi-threaded, embedding single threaded) and annembed (fully parallelized) for metagenomic binning, modified in mmgenome2 R package. Tested on a 24-thread machine with R v4.2.1

| Algorithm | Running time | NNS Parallelization | Embedding Parallelization |
|-----------|--------------|---------------------|---------------------------|
| t-SNE     | 3 min 24s    | No                  | No                        |
| UMAP      | 32.4s        | Yes                 | No                        |
| annembed  | 17.1s        | Yes                 | Yes                       |

## Supplementary Figures

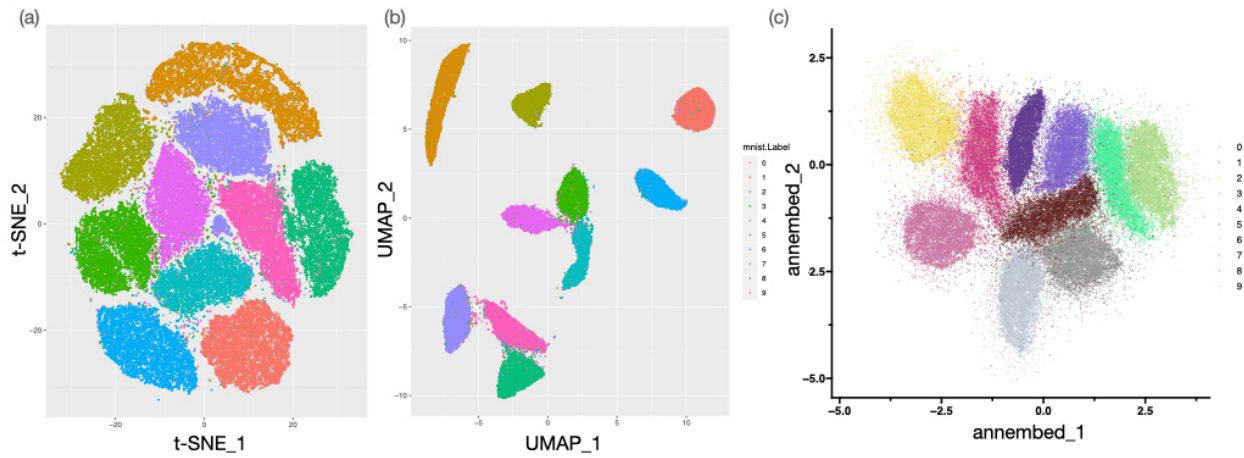

**Figure S1.** Dimension reduction for t-SNE (a), UMAP (b) and annembed (c) respectively for MNIST-digits dataset. Color legend indicates different labels.

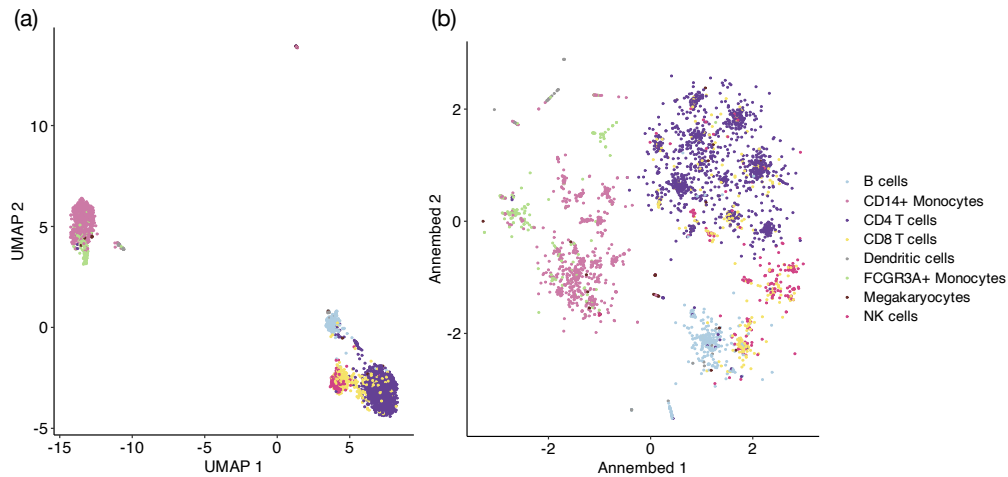

**Figure S2.** Comparisons between UMAP and annembed for single cell RNA sequencing dataset PBMC (Peripheral Blood Mononuclear Cells). Note that the distances between clusters or cell types do not have meaningful interpretations.

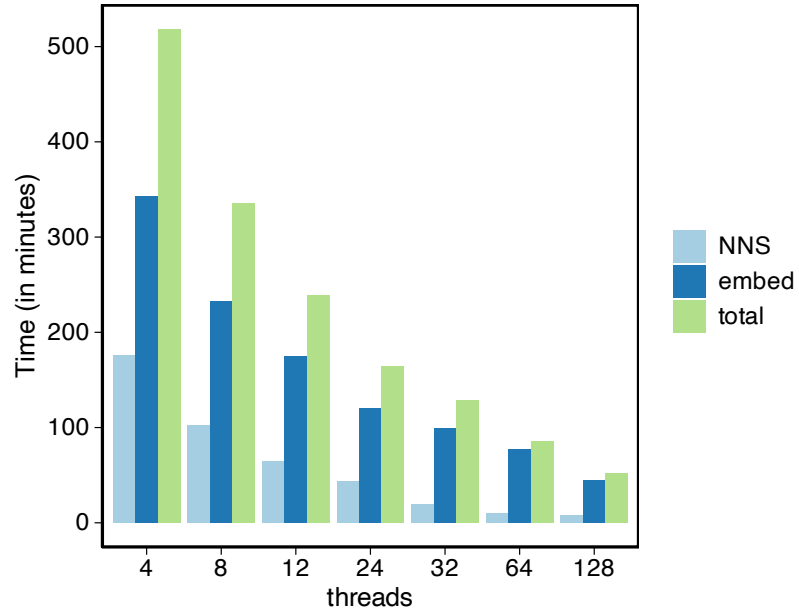

**Figure S3.** Scalability of annembed with respect to the number of NUMA threads for the HIGGS dataset. Experiments were performed on a 128-threads AMD EPYC 7713 processor (2 64-thread NUMA node). Note that for 128 threads, NNS time does not scale linearly compared to 64 threads because HNSW graph construction is NUMA sensitive.

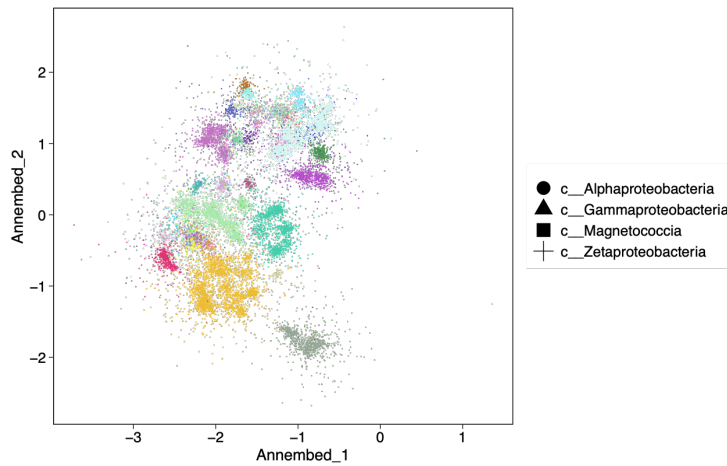

**Figure S4.** Detailed annembed plot of phylum Proteobacteria (Green in Figure 4). Each shape represents a class while different colors in each class represents different orders.

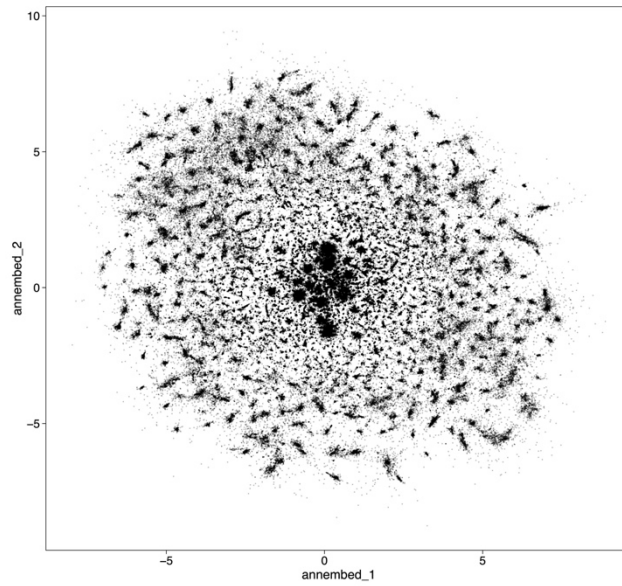

**Figure S5.** Annembed plot of all NCBI/RefSeq prokaryotic genomes (~318K) using nucleotide genome sequences. Note that each cluster is well separated, representing species to genus level clusters (80%~95% ANI)

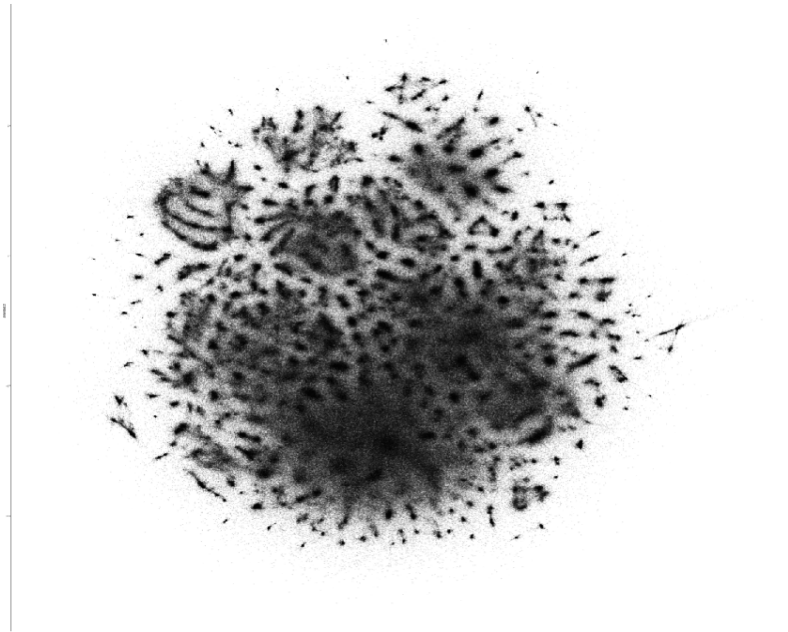

**Figure S6.** Annembed plot of IMG/VR v4 (total ~3 million genomes). Each cluster represents a phylogenetic group (family or class level) of viral genomes. ProbMinHash distances are based on amino acid sequenced predicted from the genome sequences.

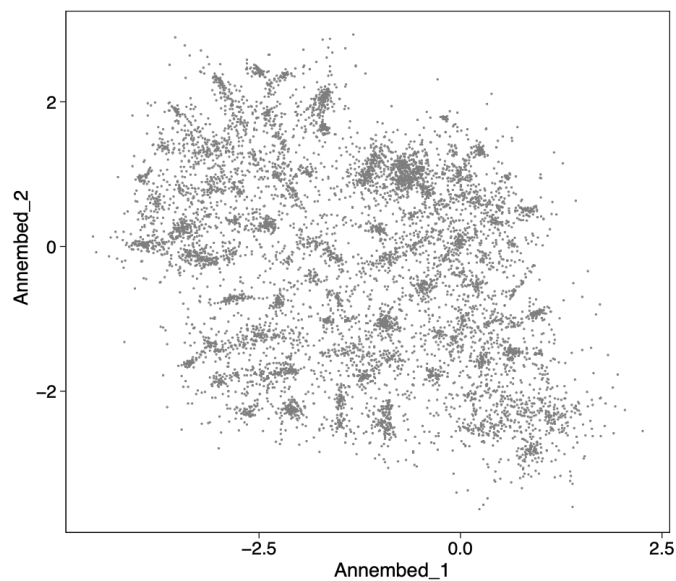



**Figure S9.** Visualization of 1.6 million SILVA 16S rRNA sequence database (prokaryotes only). Order MinHash is used for approximating Edit distance. Each color indicates a phylum.

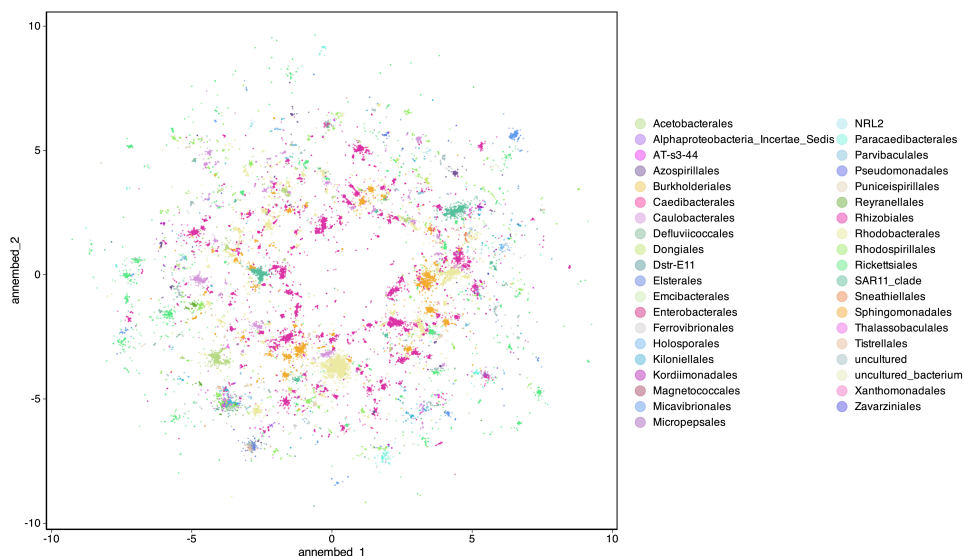

**Figure S10.** Visualization of the class alphaproteobacteria in the phylum proteobacteria (yellow points in Figure S9 above). Each color indicates an order within the class.

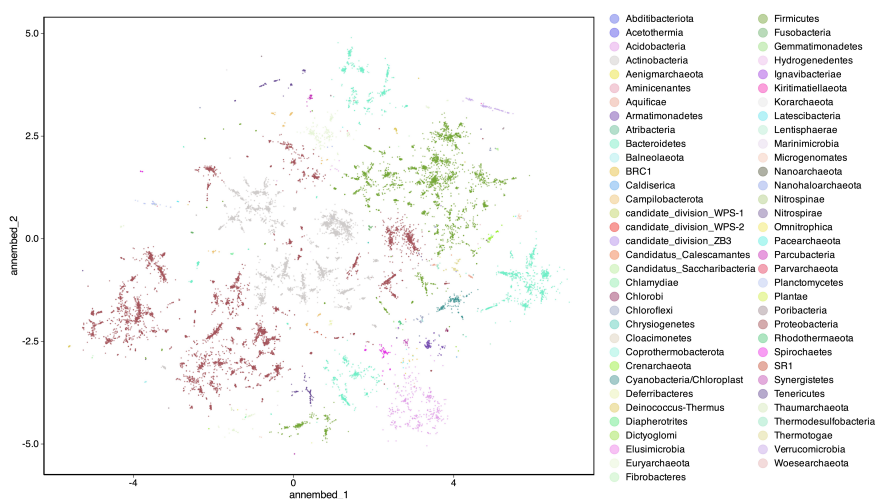

**Figure S11.** Visualization of RDB v18 ribosomal RNA database (~20K). Each color indicates a phylum.



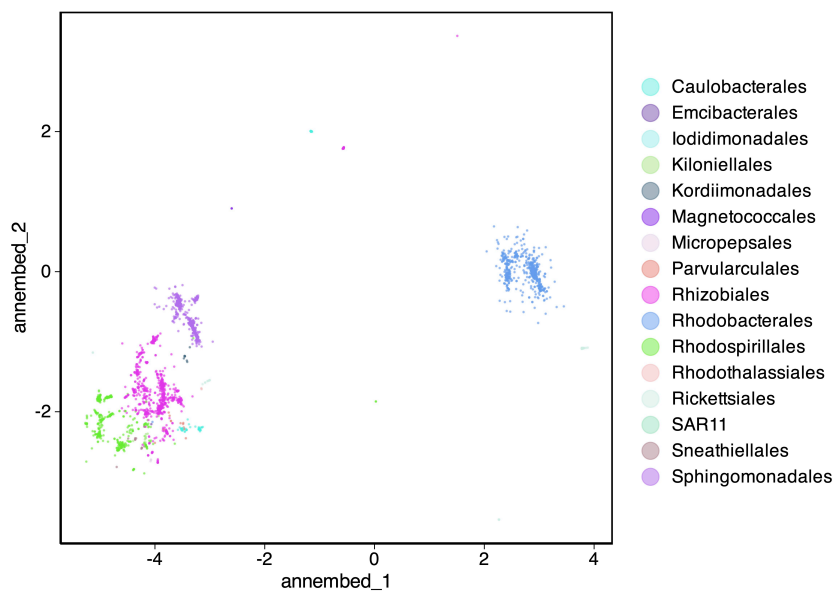

**Figure S12.** Visualization of genome clusters of the *Alphaproteobacteria* class of the *Proteobacteria* phylum (Brown points in Figure S11 above) in RDB v18 ribosomal RNA database (~20K). Each color indicates an order within the class. Also note that *Proteobacteria* have been recently renamed as *Pseudomonadota*.

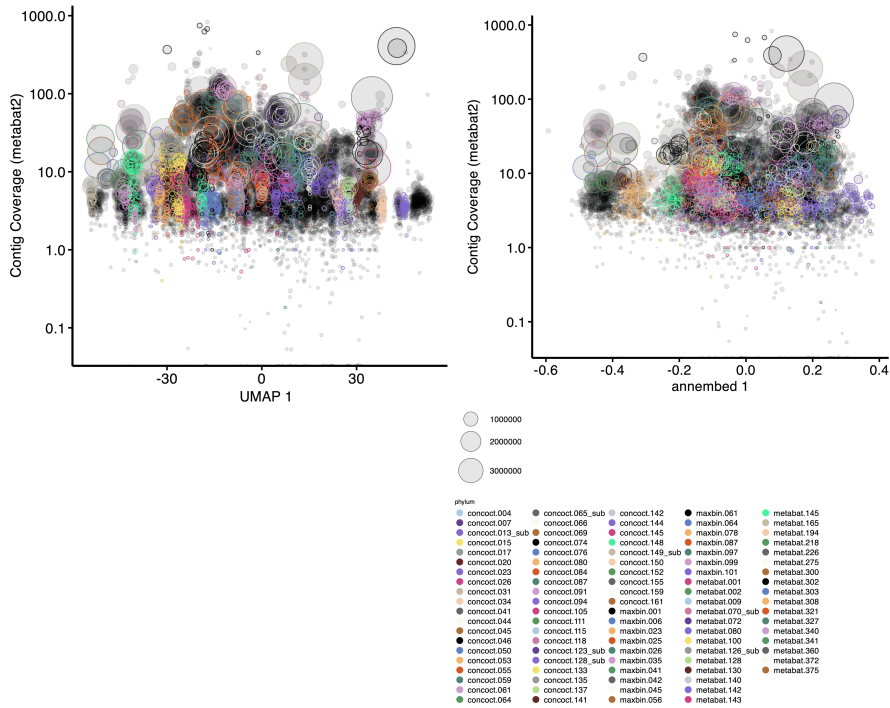

**Figure S13.** UMAP and annembed visualization of mmgenome2 genome binning results. X axis is UMAP first dimension and annembed first dimension of contig 4-mer composition based on Euclidean distance while Y is contig coverage based on metabat2 definition. Each color indicates a bin or MAG that consists of those contigs (the circle) with similar coverage and kmer composition. The size of the circle indicates contig length. See Methods & Material for how the data were prepared.

## Supplementary Methods

The true loss function that should be optimized in UMAP is:

$$\begin{aligned}\mathcal{L}(\{e_i\}|\{\mu_{ij}\}) &= -2 \sum_{1 \leq i < j \leq n} \mu_{ij} \log(\nu_{ij}) && +(1 - \mu_{ij}) \log(1 - \nu_{ij}) \\ &= -2 \sum_{1 \leq i < j \leq n} \mu_{ij} \underbrace{\log(\phi(e_i, e_j))}_{-\mathcal{L}_{ij}^a} && +(1 - \mu_{ij}) \underbrace{\log(1 - \phi(e_i, e_j))}_{-\mathcal{L}_{ij}^r}.\end{aligned}$$

However, UMAP implementation did not multiply by 2 in the first term, which leads to more attractive force (Damrich and Hamprecht, 2021). In `annembed`, we use the default loss function above.

Damrich, S., and Hamprecht, F.A. (2021) On UMAP's true loss function. *Advances in Neural Information Processing Systems* **34**: 5798-5809.
